# Supplementary material for: Prevalence and factors associated with joint pain in Nepal: findings from a countrywide cross-sectional STEPS survey
Source: PubMed Central journal article supplement — BMJ Open. 2021 Oct 6;11(10):e051536. doi: 10.1136/bmjopen-2021-051536 (PMC8496397; doi:10.1136/bmjopen-2021-051536), 2021-10-06
Supplement: bmjopen-2021-051536.draft_revisions.pdf [file bmjopen-2021-051536.draft_revisions.pdf]

# BMJ Open

BMJ Open is committed to open peer review. As part of this commitment we make the peer review history of every article we publish publicly available.

When an article is published we post the peer reviewers' comments and the authors' responses online. We also post the versions of the paper that were used during peer review. These are the versions that the peer review comments apply to.

The versions of the paper that follow are the versions that were submitted during the peer review process. They are not the versions of record or the final published versions. They should not be cited or distributed as the published version of this manuscript.

BMJ Open is an open access journal and the full, final, typeset and author-corrected version of record of the manuscript is available on our site with no access controls, subscription charges or pay-per-view fees (<http://bmjopen.bmj.com>).

If you have any questions on BMJ Open's open peer review process please email [info.bmjopen@bmj.com](mailto:info.bmjopen@bmj.com)

# BMJ Open

## Prevalence and factors associated with chronic joint pain in Nepal: Findings from a countrywide cross-sectional STEPS survey

|                               |                                                                                                                                                                                                                                                                                                                                                                                                                                                                          |
|-------------------------------|--------------------------------------------------------------------------------------------------------------------------------------------------------------------------------------------------------------------------------------------------------------------------------------------------------------------------------------------------------------------------------------------------------------------------------------------------------------------------|
| Journal:                      | <i>BMJ Open</i>                                                                                                                                                                                                                                                                                                                                                                                                                                                          |
| Manuscript ID                 | bmjopen-2021-051536                                                                                                                                                                                                                                                                                                                                                                                                                                                      |
| Article Type:                 | Original research                                                                                                                                                                                                                                                                                                                                                                                                                                                        |
| Date Submitted by the Author: | 22-Mar-2021                                                                                                                                                                                                                                                                                                                                                                                                                                                              |
| Complete List of Authors:     | Poudyal, Anil; Nepal Health Research Council, Bista, Bihungum; Nepal Health Research Council, Research Gyanwali, Pradip ; Nepal Health Research Council karki, Shristi; Nepal Health Research Council Bhattarai, Saroj; Nepal Health Research Council, Research Section Sharma, Sweekriti; The University of Sydney Faculty of Medicine and Health, Sydney School of Public Health, Institute for Musculoskeletal Health Dhimal, Meghnath; Nepal Health Research Council |
| Keywords:                     | Musculoskeletal disorders < ORTHOPAEDIC & TRAUMA SURGERY, RHEUMATOLOGY, Back pain < ORTHOPAEDIC & TRAUMA SURGERY                                                                                                                                                                                                                                                                                                                                                         |
|                               |                                                                                                                                                                                                                                                                                                                                                                                                                                                                          |

SCHOLARONE™  
Manuscripts

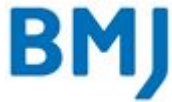

I, the Submitting Author has the right to grant and does grant on behalf of all authors of the Work (as defined in the below author licence), an exclusive licence and/or a non-exclusive licence for contributions from authors who are: i) UK Crown employees; ii) where BMJ has agreed a CC-BY licence shall apply, and/or iii) in accordance with the terms applicable for US Federal Government officers or employees acting as part of their official duties; on a worldwide, perpetual, irrevocable, royalty-free basis to BMJ Publishing Group Ltd ("BMJ") its licensees and where the relevant Journal is co-owned by BMJ to the co-owners of the Journal, to publish the Work in this journal and any other BMJ products and to exploit all rights, as set out in our [licence](#).

The Submitting Author accepts and understands that any supply made under these terms is made by BMJ to the Submitting Author unless you are acting as an employee on behalf of your employer or a postgraduate student of an affiliated institution which is paying any applicable article publishing charge ("APC") for Open Access articles. Where the Submitting Author wishes to make the Work available on an Open Access basis (and intends to pay the relevant APC), the terms of reuse of such Open Access shall be governed by a Creative Commons licence – details of these licences and which [Creative Commons](#) licence will apply to this Work are set out in our licence referred to above.

Other than as permitted in any relevant BMJ Author's Self Archiving Policies, I confirm this Work has not been accepted for publication elsewhere, is not being considered for publication elsewhere and does not duplicate material already published. I confirm all authors consent to publication of this Work and authorise the granting of this licence.

1  
2  
3 1 **Prevalence and factors associated with chronic joint pain in Nepal: Findings from a**  
4  
5  
6 2 **countrywide cross-sectional STEPS survey**  
7  
8 3  
9  
10 4

11  
12 5 Anil poudyal<sup>1</sup>, Bihungum Bista<sup>1</sup>, Pradip Gyanwali<sup>1</sup>, Shristi karki<sup>1</sup>, Saroj Bhattarai<sup>1</sup>, Sweekriti  
13 6 Sharma<sup>2</sup>, Meghnath Dhimal<sup>1</sup>  
14  
15  
16 7

17  
18 8 <sup>1</sup> Nepal Health Research Council (NHRC), Ramshah Path, Kathmandu, Nepal  
19

20 9 <sup>2</sup> Faculty of Medicine and health, Institute for Musculoskeletal health, Sydney school of public  
21 10 health , The University of Sydney and Sydney Local Health District, Sydney, NSW, Australia  
22  
23  
24 11

25  
26 12  
27  
28 13 **Correspondence : Anil poudyal; poudyalanil123@gmail.com**  
29  
30  
31  
32  
33  
34  
35  
36  
37  
38  
39  
40  
41  
42  
43  
44  
45  
46  
47  
48  
49  
50  
51  
52  
53  
54  
55  
56  
57  
58  
59  
60

## Abstract

**Objective** This study aims to determine the prevalence of chronic joint pain and its association with demographic, socioeconomic, and behavioral factors in the adult population of Nepal.

**Design** The study was a national cross sectional population-based study.

**Setting** We used the most recent nationally representative population-based cross-sectional health survey (STEPS survey, 2019) from all seven provinces of Nepal including both urban and rural areas

**Participants** The participants were men and women aged 15 to 69 years, who were usual residents of the households for at least 6 months and have stayed the night before the survey.

**Primary and secondary outcome** Primary outcomes in this study were prevalence of chronic joint pain. Chronic joint pain in our study was based on any self-reported symptoms of joint pain, stiffness and swelling lasting for more than 1 month in the past 12 months. Data were weighted to generate national estimates.

**Results** The prevalence of self-reported chronic joint pain in Nepal was 17%(95% CI: 14.3-20.2) with higher prevalence for older adults, females, single, primary education, highest wealth quintile, student, those with sufficient physical activity, those living in the Bagmati province of Nepal. In multivariable analysis self-reported chronic joint pain was found to be associated with advanced age (AOR=2.36; 95% CI 1.56-3.55), sex (AOR=1.47; 95% CI: 1.19 - 1.82) and sufficient physical activity (AOR = 0.40; 95% CI: 0.25 - 0.65).

**Conclusions** The results showed a high prevalence of chronic joint pain in Nepal's adult population. Considering the process of ageing and rapid growth in non-communicable disease, this study warrants the need for health policies directed to prevention, treatment and

1  
2  
3 36 rehabilitation for people affected by chronic musculoskeletal conditions addressing related  
4  
5 37 disabilities and loss of work in Nepal.  
6  
7

8 38 **Keywords:** prevalence, chronic joint pain, musculoskeletal conditions, Nepal  
9  
10  
11  
12  
13  
14  
15  
16  
17  
18  
19  
20  
21  
22  
23  
24  
25  
26  
27  
28  
29  
30  
31  
32  
33  
34  
35  
36  
37  
38  
39  
40  
41  
42  
43  
44  
45  
46  
47  
48  
49  
50  
51  
52  
53  
54  
55  
56  
57  
58  
59  
60

For peer review only

1  
2  
3 39 **Strength and limitation of the study**  
4

5 40 The major strength of our study is that this is the first nationwide population-based study of  
6  
7 41 chronic joint pain in Nepal with a robust sampling technique i.e. multistage stratified cluster.  
8  
9

10 42 Limitations for this study are similar to any cross-sectional population based study. First,  
11  
12 43 radiological examination and symptomatic examination are the common confirmatory diagnostic  
13  
14 44 methods for the epidemiological investigation of chronic joint pain. In our study, the  
15  
16 45 symptomatic self-reported diagnosis method was used as the main inclusion criterion for chronic  
17  
18 46 joint pain, so a questionnaire administered by an enumerator was the primary screening tool.  
19  
20  
21 47 Another potential limitation of this study was the possibility of recall bias with a one-year time  
22  
23 48 period affecting participants' ability to accurately self-report information about past pain or  
24  
25 49 consultation behavior.  
26  
27  
28  
29  
30  
31  
32  
33  
34  
35  
36  
37  
38  
39  
40  
41  
42  
43  
44  
45  
46  
47  
48  
49  
50  
51  
52  
53  
54  
55  
56  
57  
58  
59  
60

## 50 **Introduction**

51 Worldwide, musculoskeletal disorders especially joint and back pain represent the leading  
52 contributor to disability (1) and its burden is growing because of the ageing and increasing world  
53 population. A recent analysis of Global Burden of Disease (GBD) data showed that around 1.71  
54 billion people globally have musculoskeletal conditions. Musculoskeletal condition is widely  
55 recognized as the leading cause of disability in developed countries (2). However, disability  
56 related to joint and back pain is projected to markedly increase in Low-and Middle- Income  
57 Countries (LMICs) where resources are scarce, quality of care is generally low and people are  
58 becoming more sedentary (3).

59 Arthritis is now recognized as one of the most common causes of joint pain. (4). Patients  
60 routinely seek medical attention for joint pain, and it is one of the leading causes of activity  
61 limitation and absenteeism at work and poses a heavy economic burden on individuals, and  
62 society. (5)

63 Chronic joint pain is a significant public health concern that differentially burdens vulnerable  
64 populations, such as the elderly, children, and ethnic/racial minorities, due to disparities in  
65 treatment and resources (6). In a country like Nepal most of the poor people are engaged in  
66 physically demanding jobs. People not being able to perform physical work due to back pain  
67 may put many additional people into poverty. However, it is also highlighted that 80% of people  
68 with chronic pain in Nepal continue to work to fulfill the demand for money (7). Despite their  
69 epidemiological, clinical, and health economic importance, current data on the prevalence and  
70 determinates of musculoskeletal complaints in developing countries like Nepal are limited.  
71 Available information is also based on a hospital setting which doesn't provide the real situation



1  
2  
3  
4  
5  
6  
7  
8  
9  
10  
11  
12  
13  
14  
15  
16  
17  
18  
19  
20  
21  
22  
23  
24  
25  
26  
27  
28  
29  
30  
31  
32  
33  
34  
35  
36  
37  
38  
39  
40  
41  
42  
43  
44  
45  
46  
47  
48  
49  
50  
51  
52  
53  
54  
55  
56  
57  
58  
59  
60

72 of chronic joint pain. To date, country-specific chronic joint pain prevalence across parameters  
73 of socioeconomic and behavioral factors have not been systematically evaluated in a large,  
74 nationally representative sample of the population from Nepal. Hence, this study aims to  
75 determine the prevalence of chronic joint pain and its association with sociodemographic factors  
76 and underlying the behavioral factors.

77

For peer review only

## 78 **Methods**

### 79 **Study design**

80 We used the most recent nationally representative population-based cross-sectional health survey  
81 (STEPS survey, 2019) from all seven provinces of Nepal including both urban and rural areas.  
82 The survey collected information on Noncommunicable Disease (NCD) risk factors and other  
83 NCD related information in the general population.

### 84 **Sampling and sampling techniques**

85 This population based national representative sample was drawn through multistage cluster  
86 sampling using the Central Bureau of Statistics (CBS) data. A total of 25 households were  
87 sampled from each of the clusters. Household data were collected from adults aged 15-69 years  
88 by a trained enumerator. Further details about the study methodology can be found on the STEPS  
89 Survey 2019 (8).

### 90 **Outcomes**

91 Primary outcomes in this study were chronic joint pain. Chronic joint pain in our study was  
92 based on any self-reported symptoms of joint pain, stiffness and swelling lasting for more than 1  
93 month in the past 12 months.

### 94 **Covariates**

95 The following covariates were investigated for association with chronic joint pain. The  
96 demographic variables were stratified by sex (male, female) age group (15-29, 30-44, 45-69).  
97 The socioeconomic variables included marital status (married, unmarried); (education- None/less  
98 than primary, primary, secondary, more than secondary) wealth quintile (lowest, second, middle,

1  
2  
3 99 fourth, highest); occupation (Employed, student, homemaker, unemployed, others) place of  
4  
5 100 residence (urban , rural), province (province1, province 2, Bagmati province , Gandaki province,  
6  
7 101 Lumbini province , Karnali province, sudurpaschim province). Health and lifestyle variable  
8  
9  
10 102 were (smoking(yes or no), alcohol consumption (yes or no), physical activity (sufficient,  
11  
12 103 insufficient), Body Mass Index (underweight, overweight). Provincial distribution has not been  
13  
14 104 included in logistic regression analysis.  
15  
16  
17  
18 105

1  
2  
3 106 **Data collection tools and techniques:**  
4  
5

6 107 **Data analysis**  
7

8  
9 108 Data analysis was performed using Stata 13 statistical software. Descriptive analyses were  
10  
11 109 reported for a categorical variable, with relative frequencies of the prevalence of chronic joint  
12  
13 110 pain and respective 95% confidence intervals (95% CI) and p-value. Simple and multiple logistic  
14  
15 111 regression analysis was used to determine the association of chronic joint pain with age, sex,  
16  
17 112 education, marital status, occupation, residence, province, wealth quintile, BMI, physical  
18  
19 113 activity, smoking and alcohol consumption. Crude and adjusted Odds ratios and 95% Confidence  
20  
21 114 Intervals were reported and p-values of  $< 0.05$  were considered statistically significant.  
22  
23  
24  
25

26 115 **Ethical approval**  
27

28  
29 116 The data used in this study was obtained from a cross-sectional nationwide population based  
30  
31 117 survey. Ethical approval was taken from Ethical Review Board of Nepal Health Research  
32  
33 118 Council prior to conduct the NCD STEPS survey 2019. The participants were informed about  
34  
35 119 the purpose of the research study and were asked to give their written consent to participate in  
36  
37 120 the study. Regarding the under 18 years participants, both assent and consent was sought from  
38  
39 121 the guardian/parents. The participants were also guaranteed confidentiality of their information  
40  
41 122 and were notified that participation would be voluntary.  
42  
43  
44  
45

46 123  
47  
48  
49  
50  
51  
52  
53  
54  
55  
56  
57

124 **Results**

125

126 **Table 1 Descriptive characteristics of participants with chronic joint pain**

| <b>Numbers and proportions of chronic joint pain across all covariates</b> |                           |                       |
|----------------------------------------------------------------------------|---------------------------|-----------------------|
|                                                                            | <b>Chronic Joint pain</b> |                       |
| <b>Characteristics</b>                                                     | <b>Total</b>              | <b>Pain% (95% CI)</b> |
| <b>Age (n= 5,593)</b>                                                      |                           |                       |
| 15-29                                                                      | 1466                      | 9.5[6.7,13.4]         |
| 30-44                                                                      | 2,039                     | 17.4[14.1,21.2]       |
| 45-69                                                                      | 2,088                     | 29.4 [24.9,34.3]      |
| <b>Sex (n= 5593)</b>                                                       |                           |                       |
| Women                                                                      | 3,595                     | 20.1[16.7,23.9]       |
| Men                                                                        | 1,998                     | 13.6[11.0,16.7]       |
| <b>Educational attainment (n= 5592)*</b>                                   |                           |                       |
| None/less than primary                                                     | 2,792                     | 25.6 [21.3,30.4]      |
| Primary                                                                    | 1,051                     | 12.4 [9.0,16.7]       |
| Secondary                                                                  | 1,088                     | 10.8 [8.1,14.4]       |
| More than secondary                                                        | 661                       | 11 [7.4,16.1]         |
| <b>Place of residence (n= 5593)</b>                                        | -                         |                       |
| Metropolitan/submetropolitan                                               | 705                       | 9.9 [4.9,18.8]        |
| Municipality                                                               | 2,755                     | 16.3 [12.9,20.4]      |

|                                   |       |                  |
|-----------------------------------|-------|------------------|
| Rural municipality                | 2,133 | 19.8 [14.8,25.9] |
| <b>Province (n= 5593)</b>         |       |                  |
| Province 1                        | 804   | 15.9 [10.2,24.0] |
| Province 2                        | 803   | 12.5[7.0,21.4]   |
| Province 3                        | 759   | 12.3 [7.5,19.5]  |
| Gandaki province                  | 793   | 16.6[11.4,23.4]  |
| Lumbini province                  | 797   | 18.8 [11.8,28.7] |
| Province 6                        | 808   | 25.9 [19.9,33.1] |
| Sudoorpaschim                     | 829   | 25.6 [19.0,33.5] |
| <b>Wealth quintile (5,593)</b>    |       |                  |
| Lowest                            | 1,653 | 23.3 [18.9,28.5] |
| Second                            | 1,062 | 20.8 [15.8,26.9] |
| Middle                            | 949   | 15.3 [11.6,19.9] |
| Fourth                            | 878   | 15.3 [11.5,20.0] |
| Highest                           | 1,051 | 10.4 [6.8,15.6]  |
| <b>Occupation (5,587)*</b>        | -     |                  |
| Employed                          | 1,707 | 16.3 [12.4,21.1] |
| Student                           | 402   | 6.3 [3.7,10.6]   |
| Homemaker                         | 3,142 | 20.8 [17.4,24.6] |
| Unemployed                        | 273   | 18.8 [12.5,27.3] |
| Others                            | 63    | 16 [7.6,30.6]    |
| <b>Marital status (n= 5,592)*</b> |       |                  |
| Never married                     | 538   | 7.3 [4.8,11.0]   |

|                                       |       |                  |
|---------------------------------------|-------|------------------|
| Currently married                     | 4,752 | 18.9 [15.7,22.5] |
| Ever married                          | 302   | 33.7 [26.1,42.2] |
| <b>Physical activity (n= 5,493)*</b>  |       |                  |
| Sufficient                            | 5,090 | 17.8 [14.9,21.1] |
| Insufficient                          | 403   | 7 [4.3,11.2]     |
| <b>Smoking (n= 5593)</b>              |       |                  |
| No                                    | 4,528 | 16.7 [13.8,20.1] |
| Yes                                   | 1,065 | 18.4 [14.7,22.8] |
| <b>Alcohol consumption (n= 5,593)</b> |       |                  |
| No                                    | 4,441 | 16.6 [13.7,20.0] |
| Yes                                   | 1,152 | 18.6 [13.9,24.5] |
| <b>Body mass index (n= 5,499)*</b>    |       |                  |
| Normal or underweight                 | 4,009 | 16.8 [13.8,20.3] |
| Overweight                            | 1,490 | 17.9 [14.4,21.9] |
|                                       |       |                  |

127 Missing value \*

128 The overall prevalence and descriptive statistics of chronic joint pain in our study population are  
 129 summarized in Table 1. The overall prevalence of chronic joint pain in Nepal was 17.0% (95%  
 130 CI: 14.2- 20.2). The age-specific prevalence is found increasing with age and found highest 29.4  
 131 % (95% CI: 24.9-34.3) in the age group of 45-69 years and lowest 9.5% (95% CI: 6.7-13.4)  
 132 among 15-29 years aged participants. Prevalence was highest at 20.1% (95% CI: 16.7-23.9) in  
 133 females compared to males 13.6. (95% CI: 11.0-16.7). The prevalence of chronic joint pain

1  
2  
3 134 among participants who were none/less than primary educated was 25.6 [95% CI: 21.3, 30.4].  
4

5 135 Among participants with secondary education, were 10.8 (95% CI: 8.1, 14.4). The prevalence of  
6

7  
8 136 chronic joint pain varied considerably also by province, ranged from 12.3% (95% CI: 7.5-19.5)  
9

10 137 in Bagmati province to 25.9% (95% CI: 19.9-33.1) in Karnali province. By wealth quintiles,  
11

12 138 prevalence ranged from 10.4% (95% CI: 6.8-15.6) in the highest wealth quintiles to 23.3% (95%  
13

14 139 CI: 18.9-28.5) in low quintile. In terms of occupation, the prevalence was highest at 20.8% (95%  
15

16 140 CI: 17.4 -24.6) among homemakers and lowest among students 6.3% (95% CI: 3.7-10.6).  
17

18 141 Regarding their marital status, proportion was highest (33.7% (95% CI: 26.1- 42.2)) among ever  
19

20 142 married and lowest among never married (7.3% (95% CI: 4.8 -11.0)).  
21  
22  
23

24 143 In our study, prevalence was more than double 17.8% (95% CI: 14.9-21.1) among participants  
25

26 144 who engaged in sufficient physical activity compared to insufficient physical activity 7.0%  
27

28 145 (95% CI: 4.3-11.2). In addition, we found a higher prevalence 18.4% (95% CI: 14.7-22.8) among  
29

30 146 current smokers compared to non-smokers 16.7% (95% CI: 13.8-20.1]. Similarly, those  
31

32 147 individuals classified as overweight had slightly higher prevalence i.e., 17.9% (95% CI: 14.4-  
33

34 148 21.9) compared to underweight 16.8% ( (95% CI: 13.8, 20.3)  
35  
36  
37  
38

39 149  
40  
41  
42

43 150  
44  
45  
46  
47  
48  
49  
50  
51  
52  
53  
54  
55  
56  
57  
58  
59  
60



151

152 **Table 2 Factors associated with chronic joint pain**

| Characterstics                | Bivariate analysis |         | Multivariable analysis |         |
|-------------------------------|--------------------|---------|------------------------|---------|
|                               | Crude OR ( 95% CI) | P value | Adjusted OR (95% CI)   | P value |
| <b>Age</b>                    |                    |         |                        |         |
| 15-29                         | 1                  |         |                        |         |
| 30-44                         | 2 (1.39 , 2.86)    | 0.000   | 1.45 (0.99-.12)        | 0.058   |
| 45-69                         | 3.94(2.73 ,5.70)   | 0.000   | 2.36(1.56-3.55)        | 0.000   |
| <b>Sex</b>                    |                    |         |                        |         |
| Men                           | 1                  |         |                        |         |
| Women                         | 1.60 (1.32 ,1.92)  | 0.000   | 1.47 (1.19 - 1.82)     | 0.000   |
| <b>Educational attainment</b> |                    |         |                        |         |
| None/less than primary        | 1                  |         |                        |         |
| Primary                       | 0.41 (0.29 ,0.57)  | 0.000   | 0.72 (0.52 - 0.98)     | 0.037   |
| Secondary                     | 0.35 (0.26 ,0.48)  | 0.000   | 0.76 (0.56 - 1.02)     | 0.068   |
| More than secondary           | 0.36(0.22 ,0.58)   | 0.000   | 0.88 (0.53 - 1.44)     | 0.601   |
| <b>Place of residence</b>     |                    |         |                        |         |
| Metropolitan/                 | 1                  |         |                        |         |
| Submetropolitan Municipality  | 0.45 (0.20 , 1.02) | 0.055   |                        |         |

|                           |                    |       |                    |       |
|---------------------------|--------------------|-------|--------------------|-------|
| Rural municipality        | 0.79 (0.51 ,1.23)  | 0.296 |                    |       |
| <b>Province</b>           |                    |       |                    |       |
| Sudoorpaschim             | 1                  |       |                    |       |
| Province 1                | 0.55(0.29 , 1.04)  | 0.067 |                    |       |
| Province 2                | 0.42 (0.20 - 0.88) | 0.022 |                    |       |
| Bagmati Province          | 0.41 (0.21 - 0.79) | 0.008 |                    |       |
| Gandaki province          | 0.58 (0.32 - 1.03) | 0.062 |                    |       |
| Lumbini province          | 0.68 (0.35 - 1.31) | 0.246 |                    |       |
| Karnali province          | 1.02 (0.61 - 1.70) | 0.943 |                    |       |
| <b>Place of residence</b> |                    |       |                    |       |
| Urban                     | 1                  |       |                    |       |
| Rural                     | 0.51(0.23 , 1.11)  | 0.090 | 1.57 (0.80 - 3.11) | 0.192 |
| <b>Wealth quintile</b>    |                    |       |                    |       |
| Lowest                    | 1                  |       |                    |       |
| Second                    | 0.86 (0.62 - 1.20) | 0.385 | 1.02 (0.80 - 1.30) | 0.879 |
| Middle                    | 0.59 (0.42 - 0.84) | 0.003 | 0.78 (0.59 - 1.03) | 0.084 |
| Fourth                    | 0.59 (0.39 - 0.90) | 0.014 | 0.84 (0.59 - 1.20) | 0.334 |
| Highest                   | 0.38 (0.22 - 0.65) | 0.000 | 0.60 (0.37 - 0.98) | 0.043 |
| <b>Occupation</b>         |                    |       |                    |       |
| Employed                  | 1                  |       |                    |       |
| Student                   | 0.35 (0.19 - 0.64) | 0.001 | 0.59(0.27 - 1.32 ) | 0.198 |
| Homemaker                 | 1.35 (1.03 - 1.76) | 0.028 | 0.85( 0.64 - 1.13) | 0.260 |
| Unemployed                | 1.19 (0.73 - 1.95) | 0.483 | 1.05(0.73 - 1.52)  | 0.785 |

|                            |                     |       |                    |       |
|----------------------------|---------------------|-------|--------------------|-------|
| Others                     | 0.98 (0.40 - 2.40)  | 0.963 | 0.85 (0.39 - 1.89) | 0.696 |
| <b>Marital status</b>      |                     |       |                    |       |
| Unmarried                  | 1                   |       |                    |       |
| Currently married          | 2.95 (1.94 - 4.46)  | 0.000 | 1.13 (0.72 - 1.76) | 0.601 |
| Single                     | 6.43 (3.81 - 10.83) | 0.000 | 1.27(0.77 - 2.10)  | 0.347 |
| <b>Body mass index</b>     |                     |       |                    |       |
| Underweight                | 1                   |       |                    |       |
| Overweight                 | 0.93(0.72 - 1.19)   | 0.562 | 1.02(0.83 - 1.25)  | 0.847 |
| <b>Alcohol consumption</b> |                     |       |                    |       |
| Yes                        | 1                   |       |                    |       |
| No                         | 0.87 (0.60 - 1.25)  | 0.451 | 1.09(0.80 - 1.48)  | 0.604 |
| <b>Physical activity</b>   |                     |       |                    |       |
| Sufficient                 | 1                   |       |                    |       |
| Insufficient               | 0.34(0.20 - 0.59)   | 0.000 | 0.40 (0.25 - 0.65) | 0.000 |
| <b>Smoking</b>             |                     |       |                    |       |
| Yes                        | 1                   |       |                    |       |
| No                         | 0.89(0.68 - 1.16)   | 0.392 | 0.89 (0.71 - 1.13) | 0.337 |

153 \* p<0.05; \*\* p<0.01; \*\*\* p<0.001

154 A summary of bivariate and multivariable analyses is presented in Table 2. A bivariate analysis  
 155 was conducted to assess the association between chronic joint pain and risk factors. In bivariate  
 156 analysis, the variables age, sex, education, province, wealth quintile, occupation, marital status,  
 157 and physical activities were significantly ( $P \leq 0.05$ ) associated with chronic joint pain. However,

1  
2  
3 158 higher age, being a female, belonging to the highest wealth quintile and only primary education,  
4  
5 159 insufficient physical activity, were the only predictors which remained significantly associated  
6  
7  
8 160 with chronic joint pain on multiple logistic regressions.  
9

10  
11 161 The results of our study show that participants aged 45-69 years (OR=2.36 ;95% CI: 1.56-3.55)  
12  
13 162 and participants aged 30-44 years (OR=1.45;95% CI: 0.99-0.12) were more likely to have  
14  
15 163 chronic joint pain when compared to participants aged 15-29 years. Similarly, female  
16  
17 164 participants (OR=1.47;95% CI: 1.19 - 1.82) had more likely to have chronic joint pain compared  
18  
19  
20 165 to male participants. Furthermore, being in the highest wealth quintile (OR = 0.60; 95% CI:  
21  
22 166 0.37-0.98), belongs to primary schooling (OR= 0.72; 95% CI: 0.52 - 0.98), participants who  
23  
24  
25 167 were classified as completing sufficient physical activity (OR = 0.40; 95% CI =0.25 - 0.65) were  
26  
27 168 protective against chronic joint pain.  
28

29  
30 169  
31  
32  
33  
34  
35  
36  
37  
38  
39  
40  
41  
42  
43  
44  
45  
46  
47  
48  
49  
50  
51  
52  
53  
54  
55  
56  
57  
58  
59  
60

## 170 Discussion

171 This study reports population-based prevalence of self-reported Chronic joint pain and associated  
172 factors in Nepal's s adult population, aggregating rheumatic diseases and osteoarthritis, using  
173 data from the country's major nationally representative population based STEPS survey. The  
174 prevalence of Chronic joint pain in Nepal can be considered high, given that they are reported by  
175 about one in five adults. The overall prevalence of chronic joint pain in our study (17.0%) is  
176 equal to or lower than the prevalence presented in several other studies (9–13). Study design,  
177 methodologies applied, definitions, and presentation of results may explain most of the  
178 differences.

179 This study highlights that chronic joint pain is associated with older age, sex, education,  
180 province, wealth quintile, occupation, marital status, and physical activities. After adjusting for  
181 age, gender, wealth quintile, education, physical activity remained the correlates for chronic joint  
182 pain in this population.

183 In this study, as in the literature cited, women had 1.47 times greater prevalence of chronic joint  
184 pain than men. This finding may be explained, at least in part, by women being more inclined to  
185 report health problems in population surveys, sex-segregation of women into sedentary,  
186 repetitive and routine work, and the persisting gender imbalance in domestic work as well as  
187 being more frequent users of health services(14,15). In agreement with other studies a strong and  
188 increasing association was observed between age and chronic joint pain (16–18). Given longer  
189 life expectancy, the relation between age and increasing prevalence of non-communicable  
190 disease and functional disability demands more attention from health policymakers with a view  
191 to adjusting management of these conditions in the population.

1  
2  
3 192 Both wealth quintile and education show a protective effect on chronic joint pain. Wealth indices  
4  
5 193 were a better discriminator than the educational attainment for chronic joint pain in our sample.  
6  
7 194 This finding is new to Nepal as there are no supporting findings from Nepal. But few studies  
8  
9  
10 195 from outside Nepal show educational achievement has been reported to have better rheumatoid  
11  
12 196 arthritis outcome concerning pain and function(19,20).

13  
14  
15 197 Insufficient physical activity is a leading risk factor for NCDs and death worldwide. Some  
16  
17 198 studies have suggested that people who exercise regularly have a higher prevalence of  
18  
19  
20 199 Neck/shoulder pain and Low Back Pain (21,22). In line with this finding, the multivariable  
21  
22 200 model of this study also confirmed the relationship between chronic joint pain and sufficient  
23  
24 201 physical activity. In contrast, recent studies have shown that multimodal exercise programs,  
25  
26 202 which include a range of activity are effective at significantly reducing pain in osteoarthritis,  
27  
28 203 fibromyalgia, Chronic low back pain, and Rheumatoid Arthritis (23–25).

29  
30  
31  
32 204 Our findings suggest that there is no relationship between smoking (current or previous) and  
33  
34 205 chronic joint pain. Previous research examining the association between joint pain and smoking  
35  
36 206 behavior has been inconsistent: some studies found a positive association (26–28) and others  
37  
38 207 suggest no association(29).

39  
40  
41  
42 208 Alcohol consumption has many effects on bone, and increased alcohol consumption has been  
43  
44 209 shown to be associated with higher bone density(30). Therefore, it can be expected that increased  
45  
46 210 alcohol consumption may be associated with increased joint pain among participants. However,  
47  
48 211 there was no correlation between alcohol consumption and the presence of chronic joint pain in  
49  
50 212 our study.  
51  
52  
53  
54  
55  
56  
57

1  
2  
3 213 Overall, the literature suggests an association between BMI and chronic joint pain(31,32), but the  
4  
5 214 strength of the relationship varies by study and also etiology and type however we did not find  
6  
7  
8 215 any association between BMI with chronic joint pain in our survey.  
9

## 10 11 216 **Conclusion**

12  
13  
14 217 About one in five Nepali adults suffer from chronic joint pain. Ageing, female gender, belonging  
15  
16 218 to a highest wealth quintile are the important associated factors for chronic joint pain. This  
17  
18 219 population based nationally representative survey warrants health system's greater attention for  
19  
20 220 addressing the challenges of pain and disabilities associated with chronic joint pain. Further  
21  
22 221 prospective studies are needed to estimate the impact of this group of conditions particularly  
23  
24 222 addressing related disabilities and loss of works. We believe the results of our study can support  
25  
26 223 for policy and planning for chronic joint pain manangement in Nepal.  
27  
28  
29

30 224

31  
32  
33 225  
34  
35  
36  
37  
38  
39  
40  
41  
42  
43  
44  
45  
46  
47  
48  
49  
50  
51  
52  
53  
54  
55  
56  
57  
58  
59  
60

1  
2  
3 226 **Acknowledgements:** We are grateful to Ministry of Health and Population , Government of  
4  
5 227 Nepal for continuous support on genertain gevidences on NCDs and their risk factors in nepal.  
6  
7 228 our sincere appreciation towards SEARO and Nepal country office of WHO for technical  
8  
9 229 assistance. We also extend our gratitude to the Central Bureau of Statistics for assisting the  
10  
11 230 sampling procedure.  
12  
13  
14

15 231 **Contributors:** AP, BB and MD were responsible for the concept and design, analysis and  
16  
17 232 interpretation of data and writing the manuscript. PG, SK, SB, and SS participated in the  
18  
19 233 acquisition, analysis and interpretation of data, and critical revision of the manuscript. All  
20  
21 234 authors wrote the article, edited and approved the final draft of the manuscript.  
22  
23  
24

25 235 **Funding:** As the funder of the study, Nepal Health research council and WHO country office of  
26  
27 236 Nepal had no role in study design, data collection, data analysis, data interpretation or writing of  
28  
29 237 the report. The corresponding author( Anil poudyal ) had full access to all the data in the study  
30  
31 238 and had final responsibility for the decision to submit for publication.  
32  
33  
34

35 239 **Competing interests:** None declared.  
36  
37

38 240 **Patient and public involvement:** Patients and/or the public were not involved in the design, or  
39  
40 241 conduct, or reporting, or dissemination plans of this research.  
41  
42  
43

44 242 **Patient consent for publication :** Not required.  
45  
46  
47  
48  
49  
50  
51  
52  
53  
54  
55  
56  
57



243 **References**

- 244 1. World Health Organization (WHO)-Nepal. Musculoskeletal conditions [Internet]. 2019.  
245 Available from: [https://www.who.int/news-room/fact-sheets/detail/musculoskeletal-](https://www.who.int/news-room/fact-sheets/detail/musculoskeletal-conditions)  
246 conditions
- 247 2. Woolf AD, Pfleger B. Burden of major musculoskeletal conditions. Bull World Health  
248 Organ. 2003;81:646–56.
- 249 3. Clark S, Horton R. Low back pain: a major global challenge. Lancet (London, England).  
250 2018;391(10137):2302.
- 251 4. T W, L L, N C, P C, K T, A G. Efficacy of Oral Collagen in Joint Pain - Osteoarthritis and  
252 Rheumatoid Arthritis. J Arthritis. 2017;06(02):4–7.
- 253 5. Neogi T. Joint Pain Epidemiology. Iasp [Internet]. 2016;(11):18–20. Available from:  
254 [https://s3.amazonaws.com/rdcms-](https://s3.amazonaws.com/rdcms-iasp/files/production/public/Content/ContentFolders/GlobalYearAgainstPain2/2016/FactSheets/English/11.JointPainEpidemiology.pdf)  
255 [iasp/files/production/public/Content/ContentFolders/GlobalYearAgainstPain2/2016/FactS](https://s3.amazonaws.com/rdcms-iasp/files/production/public/Content/ContentFolders/GlobalYearAgainstPain2/2016/FactSheets/English/11.JointPainEpidemiology.pdf)  
256 [heets/English/11.JointPainEpidemiology.pdf](https://s3.amazonaws.com/rdcms-iasp/files/production/public/Content/ContentFolders/GlobalYearAgainstPain2/2016/FactSheets/English/11.JointPainEpidemiology.pdf)
- 257 6. Anderson KO, Green CR, Payne R. Racial and ethnic disparities in pain: causes and  
258 consequences of unequal care. J Pain. 2009;10(12):1187–204.
- 259 7. Bhattarai B, Pokhrel PK, Tripathi M, Rahman TR, Baral DD, Pande R, et al. Chronic pain  
260 and cost: an epidemiological study in the communities of Sunsari district of Nepal. Nepal  
261 Med Coll J. 2007;9(1):6–11.
- 262 8. Dhimal M, Bista B, Bhattarai S, Dixit LP, Hyder MKA, Agrawal N, Rani M JA.  
263 Noncommunicable Disease Risk Factors: STEPS Survey Nepal 2019 [Internet]. Available

- 1  
2  
3 264 from: [https://www.who.int/docs/default-source/nepal-documents/ncds/ncd-steps-survey-](https://www.who.int/docs/default-source/nepal-documents/ncds/ncd-steps-survey-2019-compressed.pdf?sfvrsn=807bc4c6_2)  
4  
5 265 [2019-compressed.pdf?sfvrsn=807bc4c6\\_2](https://www.who.int/docs/default-source/nepal-documents/ncds/ncd-steps-survey-2019-compressed.pdf?sfvrsn=807bc4c6_2)  
6  
7  
8  
9 266 9. Kulandaivelan S, Tigdania N, Ateef M, Chaturvedi R, Joshi S, Malik A, et al. Prevalence  
10  
11 267 of knee pain and its correlates with specific emphasis on CVD risk factors in Hisar urban  
12  
13 268 population. *Int J Clin Rheumtol*. 2017;12(4):Table 3,page 94.  
14  
15  
16 269 10. Haq SA, Darmawan J, Islam MN, Ahmed M, Banik SK, Fazlur Rahman AKM, et al.  
17  
18 270 Incidence of musculoskeletal pain and rheumatic disorders in a Bangladeshi rural  
19  
20 271 community: a WHO-APLAR-COPCORD study. *Int J Rheum Dis*. 2008;11(3):216–23.  
22  
23  
24 272 11. Zahid-Al-Quadir A, Zaman MM, Ahmed S, Bhuiyan MR, Rahman MM, Patwary I, et al.  
25  
26 273 Prevalence of musculoskeletal conditions and related disabilities in Bangladeshi adults: a  
27  
28 274 cross-sectional national survey. *BMC Rheumatol*. 2020;4(1):1–14.  
29  
30  
31 275 12. Veerapen K, Wigley RD, Valkenburg H. Musculoskeletal pain in Malaysia: a COPCORD  
32  
33 276 survey. *J Rheumatol*. 2007;34(1):207–13.  
34  
35  
36  
37 277 13. Liu Y, Zhang H, Liang N, Fan W, Li J, Huang Z, et al. Prevalence and associated factors  
38  
39 278 of knee osteoarthritis in a rural Chinese adult population: an epidemiological survey.  
40  
41 279 *BMC Public Health*. 2015;16(1):94.  
42  
43  
44  
45 280 14. Strazdins L, Bammer G. Women, work and musculoskeletal health. *Soc Sci Med*.  
46  
47 281 2004;58(6):997–1005.  
48  
49  
50 282 15. Wijnhoven HAH, De Vet HCW, Picavet HSJ. Prevalence of musculoskeletal disorders is  
51  
52 283 systematically higher in women than in men. *Clin J Pain*. 2006;22(8):717–24.  
53  
54  
55  
56 284 16. Cecchi F, Debolini P, Lova RM, Macchi C, Bandinelli S, Bartali B, et al. Epidemiology of

- 1  
2  
3 285 back pain in a representative cohort of Italian persons 65 years of age and older: the  
4  
5 286 InCHIANTI study. *Spine (Phila Pa 1976)*. 2006;31(10):1149.  
6  
7  
8  
9 287 17. Plesh O, Adams SH, Gansky SA. Temporomandibular Joint and Muscle Disorder  
10  
11 288 (TMJMD)-type pain and Co-morbid pains in a National US Sample. *J Orofac Pain*.  
12  
13 289 2011;25(3):190.  
14  
15  
16 290 18. Jackson T, Chen H, Iezzi T, Yee M, Chen F. Prevalence and correlates of chronic pain in a  
17  
18 291 random population study of adults in Chongqing, China. *Clin J Pain*. 2014;30(4):346–52.  
19  
20  
21  
22 292 19. Jiang X, Sandberg MEC, Saevarsdottir S, Klareskog L, Alfredsson L, Bengtsson C.  
23  
24 293 Higher education is associated with a better rheumatoid arthritis outcome concerning for  
25  
26 294 pain and function but not disease activity: results from the EIRA cohort and Swedish  
27  
28 295 rheumatology register. *Arthritis Res Ther*. 2015;17(1):317.  
29  
30  
31  
32 296 20. Riskowski JL. Associations of socioeconomic position and pain prevalence in the United  
33  
34 297 States: findings from the National Health and Nutrition Examination Survey. *Pain Med*.  
35  
36 298 2014;15(9):1508–21.  
37  
38  
39 299 21. Yao W, Luo C, Ai F, Chen Q. Risk factors for nonspecific low-back pain in Chinese  
40  
41 300 adolescents: a case-control study. *Pain Med*. 2012;13(5):658–64.  
42  
43  
44  
45 301 22. Fritz JM, Clifford SN. Low back pain in adolescents: a comparison of clinical outcomes in  
46  
47 302 sports participants and nonparticipants. *J Athl Train*. 2010;45(1):61–6.  
48  
49  
50 303 23. Hagen KB, Dagfinrud H, Moe RH, Østerås N, Kjekken I, Grotle M, et al. Exercise therapy  
51  
52 304 for bone and muscle health: an overview of systematic reviews. *BMC Med*. 2012;10(1):1–  
53  
54 305 11.  
55  
56  
57  
58  
59  
60

- 1  
2  
3 306 24. Stavropoulos-Kalinoglou A, Metsios GS, van Zanten JJV, Nightingale P, Kitas GD,  
4  
5 307 Koutedakis Y. Individualised aerobic and resistance exercise training improves  
6  
7 308 cardiorespiratory fitness and reduces cardiovascular risk in patients with rheumatoid  
8  
9 309 arthritis. *Ann Rheum Dis.* 2013;72(11):1819–25.
- 10  
11  
12  
13 310 25. Gonzalez G. *Published data only* Gonzalez J, del Teso Rubio MDM,  
14  
15 311 Walino Paniagua CN, Criado-Alvarez JJ, Sanchez Holgado J. Symptomatic pain and  
16  
17 312 fibromyalgia treatment through multidisciplinary approach for primary care. *Reumatol*  
18  
19 313 *Clin.* 2015;11(2):22–6.
- 20  
21  
22  
23 314 26. Weingarten TN, Moeschler SM, Ptaszynski AE, Hooten WM, Beebe TJ, Warner DO. An  
24  
25 315 assessment of the association between smoking status, pain intensity, and functional  
26  
27 316 interference in patients with chronic pain. *Pain Physician.* 2008;11(5):643–53.
- 28  
29  
30  
31 317 27. Mundal I, Gråwe RW, Bjørngaard JH, Linaker OM, Fors EA. Psychosocial factors and  
32  
33 318 risk of chronic widespread pain: an 11-year follow-up study—the HUNT study. *PAIN®.*  
34  
35 319 2014;155(8):1555–61.
- 36  
37  
38  
39 320 28. Palmer KT, Syddall H, Cooper C, Coggon D. Smoking and musculoskeletal disorders:  
40  
41 321 findings from a British national survey. *Ann Rheum Dis.* 2003;62(1):33–6.
- 42  
43  
44 322 29. Miranda H, Viikari-Juntura E, Martikainen R, Riihimäki H. A prospective study on knee  
45  
46 323 pain and its risk factors. *Osteoarthr Cartil.* 2002;10(8):623–30.
- 47  
48  
49 324 30. Pope DP, Hunt IM, Birrell FN, Silman AJ, MacFarlane GJ. Hip pain onset in relation to  
50  
51 325 cumulative workplace and leisure time mechanical load: a population based case-control  
52  
53 326 study. *Ann Rheum Dis.* 2003;62(4):322–6.

- 1  
2  
3 327 31. Adamson J, Ebrahim S, Dieppe P, Hunt K. Prevalence and risk factors for joint pain  
4  
5 328 among men and women in the West of Scotland Twenty-07 study. *Ann Rheum Dis*.  
6  
7 329 2006;65(4):520–4.  
8  
9  
10  
11 330 32. van Hecke O, Torrance N, Smith BH. Chronic pain epidemiology--where do lifestyle  
12  
13 331 factors fit in? *Br J pain*. 2013;7(4):209–17.  
14  
15  
16 332  
17  
18  
19 333  
20  
21  
22 334  
23  
24  
25  
26 335  
27  
28  
29 336  
30  
31  
32  
33  
34  
35  
36  
37  
38  
39  
40  
41  
42  
43  
44  
45  
46  
47  
48  
49  
50  
51  
52  
53  
54  
55  
56  
57  
58  
59  
60

For peer review only

# BMJ Open

## Prevalence and factors associated with joint pain in Nepal: Findings from a countrywide cross-sectional STEPS survey

|                                 |                                                                                                                                                                                                                                                                                                                                                                                                                                                                          |
|---------------------------------|--------------------------------------------------------------------------------------------------------------------------------------------------------------------------------------------------------------------------------------------------------------------------------------------------------------------------------------------------------------------------------------------------------------------------------------------------------------------------|
| Journal:                        | <i>BMJ Open</i>                                                                                                                                                                                                                                                                                                                                                                                                                                                          |
| Manuscript ID                   | bmjopen-2021-051536.R1                                                                                                                                                                                                                                                                                                                                                                                                                                                   |
| Article Type:                   | Original research                                                                                                                                                                                                                                                                                                                                                                                                                                                        |
| Date Submitted by the Author:   | 05-Aug-2021                                                                                                                                                                                                                                                                                                                                                                                                                                                              |
| Complete List of Authors:       | Poudyal, Anil; Nepal Health Research Council, Bista, Bihungum; Nepal Health Research Council, Research Gyanwali, Pradip ; Nepal Health Research Council karki, Shristi; Nepal Health Research Council Bhattarai, Saroj; Nepal Health Research Council, Research Section Sharma, Sweekriti; The University of Sydney Faculty of Medicine and Health, Sydney School of Public Health, Institute for Musculoskeletal Health Dhimal, Meghnath; Nepal Health Research Council |
| <b>Primary Subject Heading</b>: | Rheumatology                                                                                                                                                                                                                                                                                                                                                                                                                                                             |
| Secondary Subject Heading:      | Rheumatology, Sports and exercise medicine                                                                                                                                                                                                                                                                                                                                                                                                                               |
| Keywords:                       | Musculoskeletal disorders < ORTHOPAEDIC & TRAUMA SURGERY, RHEUMATOLOGY, Back pain < ORTHOPAEDIC & TRAUMA SURGERY, Rheumatology < INTERNAL MEDICINE, Neurological pain < NEUROLOGY, Neuromuscular disease < NEUROLOGY                                                                                                                                                                                                                                                     |
|                                 |                                                                                                                                                                                                                                                                                                                                                                                                                                                                          |

SCHOLARONE™  
Manuscripts



I, the Submitting Author has the right to grant and does grant on behalf of all authors of the Work (as defined in the below author licence), an exclusive licence and/or a non-exclusive licence for contributions from authors who are: i) UK Crown employees; ii) where BMJ has agreed a CC-BY licence shall apply, and/or iii) in accordance with the terms applicable for US Federal Government officers or employees acting as part of their official duties; on a worldwide, perpetual, irrevocable, royalty-free basis to BMJ Publishing Group Ltd ("BMJ") its licensees and where the relevant Journal is co-owned by BMJ to the co-owners of the Journal, to publish the Work in this journal and any other BMJ products and to exploit all rights, as set out in our [licence](#).

The Submitting Author accepts and understands that any supply made under these terms is made by BMJ to the Submitting Author unless you are acting as an employee on behalf of your employer or a postgraduate student of an affiliated institution which is paying any applicable article publishing charge ("APC") for Open Access articles. Where the Submitting Author wishes to make the Work available on an Open Access basis (and intends to pay the relevant APC), the terms of reuse of such Open Access shall be governed by a Creative Commons licence – details of these licences and which [Creative Commons](#) licence will apply to this Work are set out in our licence referred to above.

Other than as permitted in any relevant BMJ Author's Self Archiving Policies, I confirm this Work has not been accepted for publication elsewhere, is not being considered for publication elsewhere and does not duplicate material already published. I confirm all authors consent to publication of this Work and authorise the granting of this licence.

1  
2  
3 1 **Prevalence and factors associated with joint pain in Nepal: Findings from a countrywide**  
4  
5 2 **cross-sectional STEPS survey**  
6  
7

8 3  
9 4  
10  
11 5 Anil poudyal<sup>1</sup>, Bihungum Bista<sup>1</sup>, Pradip Gyanwali<sup>1</sup>, Shristi karki<sup>1</sup>, Saroj Bhattarai<sup>1</sup>, Sweekriti  
12 6 Sharma<sup>2</sup>, Meghnath Dhimal<sup>1</sup>  
13  
14

15 7  
16  
17 8 <sup>1</sup> Nepal Health Research Council (NHRC), Ramshah Path, Kathmandu, Nepal  
18

19 9 <sup>2</sup> Faculty of Medicine and health, Institute for Musculoskeletal health, Sydney school of public  
20 10 health , The University of Sydney and Sydney Local Health District, Sydney, NSW, Australia  
21  
22

23 11  
24  
25 12  
26  
27 13 **Correspondence : Anil poudyal; poudyalanil123@gmail.com**  
28  
29  
30  
31  
32  
33  
34  
35  
36  
37  
38  
39  
40  
41  
42  
43  
44  
45  
46  
47  
48  
49  
50  
51  
52  
53  
54  
55  
56  
57  
58  
59  
60



## 14 **Abstract**

15 **Objective** This study aims to determine the prevalence of joint pain and its association with  
16 demographic, socioeconomic, and behavioral factors in Nepal.

17 **Design** The study was a national cross sectional population-based study.

18 **Setting** We used the most recent nationally representative population-based cross-sectional  
19 health survey, The WHO STEPwise approach to surveillance (STEPS) survey, 2019 from all  
20 seven provinces of Nepal including both urban and rural areas

21 **Participants** The participants were men and women aged 15 to 69 years, who were usual  
22 residents of the households for at least 6 months and have stayed the night before the survey.

23 **Primary and secondary outcome measures** Primary outcome in this study was prevalence of  
24 joint pain. The secondary outcome measure was factors associated with joint pain in Nepal.  
25 Joint pain in our study was based on any self-reported symptoms of joint pain, stiffness and  
26 swelling lasting for more than 1 month in the past 12 months. Data were weighted to generate  
27 national estimates.

28 **Results** The prevalence of self-reported joint pain in Nepal was 17%(95% CI: 14.3-20.2) with  
29 higher prevalence for older adults, females, ever married, none/ less than primary education,  
30 smoker, lowest wealth quintile, homemaker, those with sufficient physical activity and those  
31 living in the karnali province of Nepal. In multivariable analysis self-reported joint pain was  
32 found to be associated with advanced age (AOR=2.36; 95% CI 1.56-3.55), sex (AOR=1.47; 95%  
33 CI: 1.19 - 1.82) and sufficient physical activity (AOR = 0.40; 95% CI: 0.25 - 0.65).

34 **Conclusions** The results showed a high prevalence of joint pain in Nepal. Considering the  
35 process of ageing and rapid growth in non-communicable disease, this study warrants the need

1  
2  
3 36 for health policies directed to prevention, treatment and rehabilitation for people affected by  
4  
5 37 chronic musculoskeletal conditions addressing related disabilities and loss of work in Nepal.  
6  
7

8  
9 38 **Keywords:** Prevalence, Non communicable diseases ,joint pain, Nepal  
10  
11  
12  
13  
14  
15  
16  
17  
18  
19  
20  
21  
22  
23  
24  
25  
26  
27  
28  
29  
30  
31  
32  
33  
34  
35  
36  
37  
38  
39  
40  
41  
42  
43  
44  
45  
46  
47  
48  
49  
50  
51  
52  
53  
54  
55  
56  
57  
58  
59  
60

For peer review only

1  
2  
3 39 **Strength and limitation of the study**  
4

5 **Strengths and limitations of this study**  
6

- 7
- 8 • To our knowledge, this is the first nationwide population-based study of joint pain in  
9 Nepal.
  - 10 • We used a robust sampling technique i.e. multistage stratified cluster.
  - 11 • Due to the cross-sectional nature of the study, establishing a casual relationship between  
12 the risk factors and the prevalence of the condition was not possible.
  - 13 • Diagnosis of joint pain was based on the self-reported questionnaire.
- 14  
15  
16  
17  
18  
19  
20  
21  
22  
23

24 40

25  
26  
27 41  
28  
29  
30  
31  
32  
33  
34  
35  
36  
37  
38  
39  
40  
41  
42  
43  
44  
45  
46  
47  
48  
49  
50  
51  
52  
53  
54  
55  
56  
57  
58  
59  
60

## 42 Introduction

43 Worldwide, musculoskeletal disorders especially joint and back pain represent the leading  
44 contributor to disability (1) and its burden is growing because of the ageing and increasing world  
45 population. A recent analysis of Global Burden of Disease (GBD) data showed that around 1.71  
46 billion people globally have musculoskeletal conditions. Musculoskeletal condition is widely  
47 recognized as the leading cause of disability in developed countries (2). However, disability  
48 related to joint and back pain is projected to markedly increase in Low-and Middle- Income  
49 Countries (LMICs) where resources are scarce, quality of care is generally low and people are  
50 becoming more sedentary (3).

51 Arthritis is now recognized as one of the most common causes of joint pain.(4). Patients  
52 routinely seek medical attention for joint pain, and it is one of the leading causes of activity  
53 limitation and absenteeism at work and poses a heavy economic burden on individuals, and  
54 society (5,6). Joint pain is a significant public health concern that differentially burdens  
55 vulnerable populations, such as the elderly, children, and ethnic/racial minorities, due to  
56 disparities in treatment and resources (7). In a country like Nepal most of the poor people are  
57 engaged in physically demanding jobs. People not being able to perform physical work due to  
58 back pain may put many additional people into poverty. However, it is also highlighted that 80%  
59 of people with chronic pain in Nepal continue to work to fulfill the demand for money (8). The  
60 epidemiology of chronic joint pain and its relationship with sociodemographic and behavioral  
61 factors have been reported by numerous studies from various geographical regions and  
62 countries(9). The literature indicates a set of factors associated with joint pain, such as  
63 sociodemographics factors (age, income, sex, and education), lifestyles (smoking and low

1  
2  
3 64 physical activity, or vigorous physical work), and metabolic risk factors (obesity and other  
4  
5 65 comorbid chronic conditions)(10–12)  
6  
7

8  
9 66 Despite their epidemiological, clinical, and health economic importance, current data on the  
10  
11 67 prevalence and determinates of musculoskeletal complaints in developing countries like Nepal  
12  
13 68 are limited. Available information is also based on a hospital setting which doesn't provide the  
14  
15 69 real situation of joint pain. To date, country-specific joint pain prevalence across parameters of  
16  
17 70 socioeconomic and behavioral factors have not been systematically evaluated in a large,  
18  
19 71 nationally representative sample of the population from Nepal. Hence, this study aims to  
20  
21 72 determine the prevalence of joint pain and its association with sociodemographic factors and  
22  
23 73 underlying the behavioral factors.  
24  
25  
26  
27  
28 74

## 75 **Methods**

### 76 **Study design**

77 We used the most recent nationally representative population-based cross-sectional health survey  
78 (STEPS survey, 2019) from all seven provinces of Nepal including both urban and rural areas.

79 The survey was conducted using the standardized WHO NCD STEPS instrument version  
80 3.2(13), by incorporating all of the core questions with some selected country-specific modules  
81 to assess the joint and back pain in consultation with WHO regional office for South- east Asia.

82 The questionnaire was translated into Nepali and validated by translation and back translation.

83 The field enumerators underwent a 4-day intensive training before deployment. The STEPS field  
84 work was carried out between February 9, 2019 to May 8, 2019. Participants were involved in  
85 the study for two days. Data collection techniques included a face-to- face interview for  
86 demographic information and behavioral measurement (STEP 1), physical measurements (STEP  
87 2) and biochemical measurements (blood and urine) collection (STEP 3). The survey data were  
88 collected by an android tablets on the spot and transferred and stored in ONA data base server

### 90 **Sampling and sampling techniques**

91 This population based national representative sample was drawn through multistage cluster  
92 sampling using the Central Bureau of Statistics (CBS) data. A total of 25 households were  
93 sampled from each of the clusters. Household data were collected from adults aged 15-69 years  
94 by a trained enumerators. Sample size calculation was based on the sample calculator used in the  
95 WHO STEPS approach. The sample size was adjusted for design effect for complex sample  
96 design set at 2, prevalence of 0.5 for most indicators as the conservative estimate, 0.05 margin of

1  
2  
3 97 error, 95% confidence interval and a non-response rate of 15%. With these adjustments, the final  
4  
5 98 sample was 6475. Assuming a response rate of 86.7% in STEP 1, total sample size was adjusted  
6  
7  
8 99 for 5593. From each of the selected household, one person between the ages of 15-69 was  
9  
10 100 sampled randomly from all the eligible adults in a household using the android tablet. Further  
11  
12 101 details about the study methodology can be found on the STEPS Survey 2019 (14).  
13  
14

## 15 102 **Outcomes**

16  
17  
18 103 Primary outcome in this study was prevalence of joint pain. The secondary outcome measures  
19  
20 104 were factors associated with joint pain in Nepal. Joint pain in our study was based on any self-  
21  
22 105 reported symptoms of joint pain, stiffness and swelling lasting for more than 1 month in the past  
23  
24  
25 106 12 months. Participants were defined as having joint pain if they had either rheumatoid arthritis  
26  
27 107 or osteoarthritis. Participants who reported having joint pain/stiffness/ swelling lasting for more  
28  
29 108 than one month and not associated with any injury along with morning stiffness or stiffness after  
30  
31 109 a long rest lasting less than 30 min that goes away after exercise of the joint are categorized as  
32  
33 110 having probable arthritis; while participants who reported having morning stiffness or stiffness  
34  
35 111 after a long rest lasting more than 30 min and that does not go away after exercise of the joint  
36  
37 112 were categorized having probable rheumatoid arthritis  
38  
39  
40  
41  
42  
43  
44

## 45 114 **Covariates**

46  
47  
48 115 The following covariates were investigated for association with joint pain. The demographic  
49  
50 116 variables were stratified by sex (male, female) age group (15-29, 30-44, 45-69). The  
51  
52 117 socioeconomic variables included marital status (never married, currently married, ever married);  
53  
54 118 (education- None/less than primary, primary, secondary, more than secondary) wealth quintile  
55  
56  
57  
58  
59  
60

1  
2  
3 119 (lowest, second, middle, fourth, highest); occupation (Employed, student, homemaker,  
4  
5 120 unemployed, others) place of residence (urban , rural), province (province1, province 2, Bagmati  
6  
7 121 province , Gandaki province, Lumbini province , Karnali province, sudurpaschim province).  
8  
9 122 Health and lifestyle variable were smoking(yes or no), alcohol consumption (yes or no), physical  
10  
11 123 activity (PA) was assessed using the WHO recommended Global Physical Activity  
12  
13 124 Questionnaire (GPAQ) version 2 .0, calculating the Metabolic Equivalent of Task (MET) value  
14  
15 125 in minutes per week for work, recreational, and transport domains. Sufficient physical activity  
16  
17 126 was defined as any combination of physical activities that exceeds 600 METs per week or (more  
18  
19 127 than 150 min per week). Insufficient physical activity (IPA) was defined according to WHO  
20  
21 128 recommendation (less than 600 METs per week)or (less than 150 min per week). Body Mass  
22  
23 129 Index(BMI) ) in kg/m<sup>2</sup> was classified into following categories: Underweight (< 18.5 kg/m<sup>2</sup>),  
24  
25 130 normal weight (18.5–24.9 kg/m<sup>2</sup>), overweight (25–29.9 kg/m<sup>2</sup>), and obesity ( $\geq$  30 kg/m<sup>2</sup>). In the  
26  
27 131 final analysis, we merged 'underweight' and 'normal' as well as overweight and obese together as  
28  
29 132 the number of individuals for these categories was too small to constitute a standalone BMI  
30  
31 133 group. Provincial distribution has not been included in logistic regression analysis.  
32  
33  
34  
35  
36  
37  
38  
39  
40  
41  
42  
43  
44  
45  
46  
47  
48  
49  
50  
51  
52  
53  
54  
55  
56  
57  
58  
59  
60



1  
2  
3 **135 Data collection tools and techniques:**  
4  
5

6 **136 Data management and analysis**  
7  
8

9 137 Data were collected electronically using PDAs programmed with WHO e-STEPS software. The  
10  
11 138 data from the field was downloaded from the personal digital assistant (PDA) which was then  
12  
13  
14 139 exported on Microsoft excel for cleaning and cross-checked the inconsistencies. Data analysis  
15  
16 140 was performed using STATA 15.0 Stata Corp LLC, USA and Epi Info version 3.4 with  
17  
18 141 appropriate methods for the complex sample design of the survey. Descriptive analyses were  
19  
20 142 reported for a categorical variable, with relative frequencies of the prevalence of joint pain and  
21  
22 143 respective 95% confidence intervals (95% CI) and p-value.  
23  
24  
25

26 144 Associations between dependent and independent variables were tested using Chi-square.  
27  
28 145 Bivariate analysis was conducted to analyze the unconditional association between each  
29  
30 146 explanatory variable and joint pain status. Multicollinearity, the variance inflation factor (VIF)  
31  
32 147 was assessed for all the independent variables found to be statistically significant from the  
33  
34 148 bivariate analysis. All explanatory variables in the bivariate analysis were inserted in the  
35  
36 149 multivariate binary logistic regression model to see the independent effect of each variable on  
37  
38 150 occurrence of joint pain. For those variables that were not included in the final model, only the  
39  
40 151 unadjusted odds ratio are presented. Finally, we present both unadjusted and adjusted odds ratios  
41  
42  
43  
44 152 with 95% confidence intervals (CIs).  
45  
46  
47

48 153  
49  
50  
51  
52  
53  
54  
55  
56  
57

1  
2  
3 154  
4  
56 **155 Ethical approval**  
7  
8

9 156 The data used in this study was obtained from a cross-sectional nationwide population based  
10  
11 157 survey. Ethical approval was taken from Ethical Review Board of Nepal Health Research  
12  
13  
14 158 Council prior to conduct the NCD STEPS survey 2019. The participants were informed about  
15  
16 159 the purpose of the research study and were asked to give their written consent to participate in  
17  
18 160 the study. Regarding the under 18 years participants, both assent and consent was sought from  
19  
20 161 the guardian/parents. The participants were also guaranteed confidentiality of their information  
21  
22  
23 162 and were notified that participation would be voluntary.  
24  
25

26 163  
27  
28  
29  
30  
31  
32  
33  
34  
35  
36  
37  
38  
39  
40  
41  
42  
43  
44  
45  
46  
47  
48  
49  
50  
51  
52  
53  
54  
55  
56  
57  
58  
59  
60

164 **Results**

165

166 **Table 1 Descriptive characteristics of participants with joint pain**

| <b>Numbers and proportions of joint pain across all covariates</b> |                   |                       |
|--------------------------------------------------------------------|-------------------|-----------------------|
|                                                                    | <b>Joint pain</b> |                       |
| <b>Characteristics</b>                                             | <b>Total</b>      | <b>Pain% (95% CI)</b> |
| <b>Age (n= 5593)</b>                                               |                   |                       |
| 15-29                                                              | 1466              | 9.5[6.7-13.4]         |
| 30-44                                                              | 2039              | 17.4[14.1-21.2]       |
| 45-69                                                              | 2088              | 29.4 [24.9-34.3]      |
| <b>Sex (n= 5593)</b>                                               |                   |                       |
| Women                                                              | 3595              | 20.1[16.7-23.9]       |
| Men                                                                | 1998              | 13.6[11.0-16.7]       |
| <b>Educational attainment (n= 5592)*</b>                           |                   |                       |
| None/less than primary                                             | 2792              | 25.6 [21.3-30.4]      |
| Primary                                                            | 1051              | 12.4 [9.0-16.7]       |
| Secondary                                                          | 1088              | 10.8 [8.1-14.4]       |
| More than secondary                                                | 661               | 11 [7.4-16.1]         |
| <b>Place of residence (n= 5593)</b>                                | -                 |                       |
| Metropolitan/submetropolitan                                       | 705               | 9.9 [4.9-18.8]        |
| Municipality                                                       | 2755              | 16.3 [12.9-20.4]      |

|                                  |      |                  |
|----------------------------------|------|------------------|
| Rural municipality               | 2133 | 19.8 [14.8-25.9] |
| <b>Province (n= 5593)</b>        |      |                  |
| Province 1                       | 804  | 15.9 [10.2-24.0] |
| Province 2                       | 803  | 12.5[7.0-21.4]   |
| Bagmati province                 | 759  | 12.3 [7.5-19.5]  |
| Gandaki province                 | 793  | 16.6[11.4-23.4]  |
| Lumbini province                 | 797  | 18.8 [11.8-28.7] |
| Karnali province                 | 808  | 25.9 [19.9-33.1] |
| Sudoorpaschim                    | 829  | 25.6 [19.0-33.5] |
| <b>Wealth quintile (n=5593)</b>  |      |                  |
| Lowest                           | 1653 | 23.3 [18.9-28.5] |
| Second                           | 1062 | 20.8 [15.8-26.9] |
| Middle                           | 949  | 15.3 [11.6-19.9] |
| Fourth                           | 878  | 15.3 [11.5-20.0] |
| Highest                          | 1051 | 10.4 [6.8-15.6]  |
| <b>Occupation (n=5587)*</b>      | -    |                  |
| Employed                         | 1707 | 16.3 [12.4-21.1] |
| Student                          | 402  | 6.3 [3.7-10.6]   |
| Homemaker                        | 3142 | 20.8 [17.4-24.6] |
| Unemployed                       | 273  | 18.8 [12.5-27.3] |
| Others                           | 63   | 16 [7.6-30.6]    |
| <b>Marital status (n= 5592)*</b> |      |                  |
| Never married                    | 538  | 7.3 [4.8-11.0]   |

|                                            |       |                   |
|--------------------------------------------|-------|-------------------|
| Currently married                          | 4752  | 18.9 [15.7-22.5]  |
| Ever married                               | 302   | 33.7 [26.1-42.2]  |
| <b>Physical activity (n= 5493)*</b>        |       |                   |
| Sufficient (more than 150 min per week)    | 5090  | 17.8 [14.9-21.1]  |
| Insufficient ( Less than 150 min per week) | 403   | 7 [4.3-11.2]      |
| <b>Smoking (n= 5593)</b>                   |       |                   |
| No                                         | 4528  | 16.7 [13.8-20.1]  |
| Yes                                        | 1065  | 18.4 [14.7-22.8]  |
| <b>Alcohol consumption (n= 5593)</b>       |       |                   |
| No                                         | 4441  | 16.6 [13.7-20.0]  |
| Yes                                        | 1,152 | 18.6 [13.9-24.5]  |
| <b>Body mass index (n= 5499)*</b>          |       |                   |
| Normal or underweight                      | 4009  | 16.8 [13.8-20.3]  |
| Overweight                                 | 1490  | 17.9 [14.4-21.9]  |
| Total                                      | 5593  | 17.0 [ 14.3-20.2] |

167 Missing value \*

168 The overall prevalence and descriptive statistics of joint pain in our study population are  
 169 summarized in Table 1. The overall prevalence of joint pain in Nepal was 17.0% (95% CI: 14.2-  
 170 20.2). The age-specific prevalence is found increasing with age and found highest 29.4 % (95%  
 171 CI: 24.9-34.3) in the age group of 45-69 years and lowest 9.5% (95% CI: 6.7-13.4) among 15-29

172 years aged participants. Prevalence was highest at 20.1% (95% CI: 16.7-23.9) in females  
173 compared to males 13.6. (95% CI: 11.0-16.7). The prevalence of joint pain among participants  
174 who were none/less than primary educated was 25.6 (95% CI: 21.3- 30.4). Among participants  
175 with secondary education, were 10.8 (95% CI: 8.1- 14.4). The prevalence of joint pain varied  
176 considerably also by province, ranged from 12.3% (95% CI: 7.5-19.5) in Bagmati province to  
177 25.9% (95% CI: 19.9-33.1) in Karnali province. By wealth quintiles, prevalence ranged from  
178 10.4% (95% CI: 6.8-15.6) in the highest wealth quintiles to 23.3% (95% CI: 18.9-28.5) in low  
179 quintile. In terms of occupation, the prevalence was highest at 20.8% (95% CI: 17.4 -24.6)  
180 among homemakers and lowest among students 6.3% (95% CI: 3.7-10.6). Regarding their  
181 marital status, proportion was highest (33.7% (95% CI: 26.1- 42.2)) among ever married and  
182 lowest among never married 7.3% (95% CI: 4.8 -11.0).

183 In our study, prevalence was more than double 17.8% (95% CI: 14.9-21.1) among participants  
184 who engaged in sufficient physical activity compared to insufficient physical activity 7.0% (95%  
185 CI: 4.3-11.2). In addition, we found a higher prevalence 18.4% (95% CI: 14.7-22.8) among  
186 current smokers compared to non-smokers 16.7% (95% CI: 13.8-20.1]. Similarly, those  
187 individuals classified as overweight had slightly higher prevalence i.e., 17.9% (95% CI: 14.4-  
188 21.9) compared to underweight 16.8% (95% CI: 13.8-20.3)

189  
190

191

192 **Table 2 Factors associated with joint pain**

| Characteristics               | Bivariate analysis |         | Multivariable analysis |         |
|-------------------------------|--------------------|---------|------------------------|---------|
|                               | Crude OR ( 95% CI) | P value | Adjusted OR (95% CI)   | P value |
| <b>Age</b>                    |                    |         |                        |         |
| 15-29                         | 1                  |         |                        |         |
| 30-44                         | 2 (1.39 -2.86)     | ***     | 1.45 (0.99-2.12)       | *       |
| 45-69                         | 3.94(2.73 -5.70)   | ***     | 2.36(1.56-3.55)        | ***     |
| <b>Sex</b>                    |                    |         |                        |         |
| Men                           | 1                  |         |                        |         |
| Women                         | 1.60 (1.32 -1.92)  | ***     | 1.47 (1.19 - 1.82)     | ***     |
| <b>Educational attainment</b> |                    |         |                        |         |
| None/less than primary        | 1                  |         |                        |         |
| Primary                       | 0.41 (0.29 -0.57)  | ***     | 0.72 (0.52 - 0.98)     | *       |
| Secondary                     | 0.35 (0.26 -0.48)  | ***     | 0.76 (0.56 - 1.02)     | 0.068   |
| More than secondary           | 0.36(0.22 -0.58)   | ***     | 0.88 (0.53 - 1.44)     | 0.601   |
| <b>Place of residence</b>     |                    |         |                        |         |
| Metropolitan/                 | 1                  |         |                        |         |
| Submetropolitan Municipality  | 0.45 (0.20 - 1.02) | *       |                        |         |

|                           |                    |       |                    |       |
|---------------------------|--------------------|-------|--------------------|-------|
| Rural municipality        | 0.79 (0.51 - 1.23) | 0.296 |                    |       |
| <b>Province</b>           |                    |       |                    |       |
| Sudoorpaschim             | 1                  |       |                    |       |
| Province 1                | 0.55(0.29 - 1.04)  | 0.067 |                    |       |
| Province 2                | 0.42 (0.20 - 0.88) | *     |                    |       |
| Bagmati Province          | 0.41 (0.21 - 0.79) | **    |                    |       |
| Gandaki province          | 0.58 (0.32 - 1.03) | 0.062 |                    |       |
| Lumbini province          | 0.68 (0.35 - 1.31) | 0.246 |                    |       |
| Karnali province          | 1.02 (0.61 - 1.70) | 0.943 |                    |       |
| <b>Place of residence</b> |                    |       |                    |       |
| Urban                     | 1                  |       |                    |       |
| Rural                     | 0.51(0.23 - 1.11)  | 0.090 | 1.57 (0.80 - 3.11) | 0.192 |
| <b>Wealth quintile</b>    |                    |       |                    |       |
| Lowest                    | 1                  |       |                    |       |
| Second                    | 0.86 (0.62 - 1.20) | 0.385 | 1.02 (0.80 - 1.30) | 0.879 |
| Middle                    | 0.59 (0.42 - 0.84) | **    | 0.78 (0.59 - 1.03) | 0.084 |
| Fourth                    | 0.59 (0.39 - 0.90) | **    | 0.84 (0.59 - 1.20) | 0.334 |
| Highest                   | 0.38 (0.22 - 0.65) | ***   | 0.60 (0.37 - 0.98) | *     |
| <b>Occupation</b>         |                    |       |                    |       |
| Employed                  | 1                  |       |                    |       |
| Student                   | 0.35 (0.19 - 0.64) | ***   | 0.59(0.27 - 1.32 ) | 0.198 |
| Homemaker                 | 1.35 (1.03 - 1.76) | *     | 0.85( 0.64 - 1.13) | 0.260 |
| Unemployed                | 1.19 (0.73 - 1.95) | 0.483 | 1.05(0.73 - 1.52)  | 0.785 |



|                                           |                     |       |                    |       |
|-------------------------------------------|---------------------|-------|--------------------|-------|
| Others                                    | 0.98 (0.40 - 2.40)  | 0.963 | 0.85 (0.39 - 1.89) | 0.696 |
| <b>Marital status</b>                     |                     |       |                    |       |
| Unmarried                                 | 1                   |       |                    |       |
| Currently married                         | 2.95 (1.94 - 4.46)  | ***   | 1.13 (0.72 - 1.76) | 0.601 |
| Single                                    | 6.43 (3.81 - 10.83) | ***   | 1.27(0.77 - 2.10)  | 0.347 |
| <b>Body mass index</b>                    |                     |       |                    |       |
| Normal or Underweight                     | 1                   |       |                    |       |
| Overweight                                | 0.93(0.72 - 1.19)   | 0.562 | 1.02(0.83 - 1.25)  | 0.847 |
| <b>Alcohol consumption</b>                |                     |       |                    |       |
| Yes                                       | 1                   |       |                    |       |
| No                                        | 0.87 (0.60 - 1.25)  | 0.451 | 1.09(0.80 - 1.48)  | 0.604 |
| <b>Physical activity</b>                  |                     |       |                    |       |
| Sufficient(more than 150 min per week)    | 1                   |       |                    |       |
| Insufficient (less than 150 min per week) | 0.34(0.20 - 0.59)   | ***   | 0.40 (0.25 - 0.65) | ***   |
| <b>Smoking</b>                            |                     |       |                    |       |
| Yes                                       | 1                   |       |                    |       |
| No                                        | 0.89(0.68 - 1.16)   | 0.392 | 0.89 (0.71 - 1.13) | 0.337 |

193 \* p<0.05; \*\* p<0.01; \*\*\* p<0.001

194 A summary of bivariate and multivariable analyses is presented in Table 2. A bivariate analysis  
 195 was conducted to assess the association between joint pain and risk factors. In bivariate analysis,

1  
2  
3 196 the variables age, sex, education, province, wealth quintile, occupation, marital status, and  
4  
5 197 physical activities were significantly ( $P \leq 0.05$ ) associated with joint pain. However, higher age,  
6  
7 198 being a female, belonging to the highest wealth quintile and only primary education, insufficient  
8  
9 199 physical activity, were the only predictors which remained significantly associated with joint  
10  
11 200 pain on multiple logistic regressions.  
12  
13  
14

15 201 The results of our study show that participants aged 45-69 years (OR=2.36 ;95% CI: 1.56-3.55)  
16  
17 202 and participants aged 30-44 years (OR=1.45;95% CI: 0.99-0.12) were more likely to have joint  
18  
19 203 pain when compared to participants aged 15-29 years. Similarly, female participants  
20  
21 204 (OR=1.47;95% CI: 1.19 - 1.82) had more likely to have joint pain compared to male  
22  
23 205 participants. Furthermore, being in the highest wealth quintile (OR = 0.60; 95% CI: 0.37-0.98),  
24  
25 206 belongs to primary schooling (OR= 0.72; 95% CI: 0.52 - 0.98), participants who were classified  
26  
27 207 as completing sufficient physical activity (OR = 0.40; 95% CI =0.25 - 0.65) were protective  
28  
29 208 against joint pain.  
30  
31  
32  
33  
34

35 209  
36  
37  
38  
39  
40  
41  
42  
43  
44  
45  
46  
47  
48  
49  
50  
51  
52  
53  
54  
55  
56  
57  
58  
59  
60

## 210 Discussion

211 This study reports population-based prevalence of self-reported joint pain and associated factors  
212 in the Nepal, aggregating rheumatic diseases and osteoarthritis, using data from the country's  
213 major nationally representative population based STEPS survey. The prevalence of joint pain in  
214 Nepal can be considered high, given that they are reported by about one in five adults. The  
215 overall prevalence of joint pain in our study (17.0%) is equal to or lower than the prevalence  
216 presented in several other studies (15–19). Study design, methodologies applied, definitions, and  
217 presentation of results may explain most of the differences.

218 This study highlights that joint pain is associated with older age, sex, education, province,  
219 wealth quintile, occupation, marital status, and physical activities. After adjusting for age,  
220 gender, wealth quintile, education, physical activity remained the correlates for joint pain in this  
221 population.

222 In this study, as in the literature cited, women had 1.47 times greater prevalence of joint pain  
223 than men. This finding may be explained, at least in part, by women being more inclined to  
224 report health problems in population surveys, sex-segregation of women into sedentary,  
225 repetitive and routine work, and the persisting gender imbalance in domestic work as well as  
226 being more frequent users of health services(20,21). In agreement with other studies a strong and  
227 increasing association was observed between age and joint pain (22–24). Given longer life  
228 expectancy, the relation between age and increasing prevalence of non-communicable disease  
229 and functional disability demands more attention from health policymakers with a view to  
230 adjusting management of these conditions in the population.

1  
2  
3 231 Both wealth quintile and education show a protective effect on joint pain. Wealth indices were a  
4  
5 232 better discriminator than the educational attainment for joint pain in our sample. This finding is  
6  
7 233 new to Nepal as there are no supporting findings from Nepal. But few studies from outside Nepal  
8  
9 234 show educational achievement has been reported to have better rheumatoid arthritis outcome  
10  
11  
12 235 concerning pain and function(25,26).

13  
14  
15 236 Well planned physical activity has a protective effect on the joints; this is confirmed by the  
16  
17 237 numerous scientific studies(27–29). Physical activity and exercise are increasingly being  
18  
19 238 promoted and offered in various health care setting, and for a variety of chronic musculoskeletal  
20  
21 239 conditions. However our multivariable model of this study confirmed the relationship between  
22  
23 240 joint pain and sufficient physical activity. This seems contrary to the common notion that a  
24  
25 241 sufficient physical activity may decrease the risk of chronic joint pain; this contrasting finding  
26  
27 242 may be due to the fact that, we used the self-report measurement based on GPAQ questionnaire  
28  
29 243 rather direct measurement via observation or other methods e.g multimodal exercise based  
30  
31 244 approach , which may have resulted bias in the association between physical activity and joint  
32  
33 245 pain, an objective measure - preferable for assessing the physical activity level in the population.

34  
35  
36 246 Our findings suggest that there is no relationship between smoking (current or previous) and  
37  
38 247 joint pain. Previous research examining the association between joint pain and smoking behavior  
39  
40 248 has been inconsistent: some studies found a positive association (30–32) and others suggest no  
41  
42 249 association(33).

43  
44  
45 250 Alcohol consumption has many effects on bone, and increased alcohol consumption has been  
46  
47 251 shown to be associated with higher bone density(34). Therefore, it can be expected that increased  
48  
49 252 alcohol consumption may be associated with increased joint pain among participants. However,  
50  
51  
52  
53  
54  
55  
56  
57

253 there was no correlation between alcohol consumption and the presence of joint pain in our  
254 study.

255 Overall, the literature suggests an association between BMI and joint pain(35,36), but the  
256 strength of the relationship varies by study and also etiology and type however we did not find  
257 any association between BMI with joint pain in our survey.

258 Our study has several strengths and limitations. The main strengths include, large sample size,  
259 coverage of urban and rural residence; all three ecological belts of the country – the mountains  
260 hills and terai, and all provinces of Nepal making it nationally representative data and  
261 generalizable among Nepalese population. However, a questionnaire administered by an  
262 enumerators was the primary screening tool used and the diagnosis for joint pain was based on  
263 the answers to the symptomatic self-reported questions by participants .Another potential  
264 limitation of this study include lack of standardized measuring tool for the joint pain and  
265 possibility of recall bias with a one-year time period .

## 266 **Conclusion**

267 About one in five Nepali population suffer from joint pain. Ageing, female gender, belonging to  
268 a highest wealth quintile are the important associated factors for joint pain. Similarly, people  
269 having insuffeicnet physical activity (Less than 150 min per week) have a low risk of developing  
270 joint pain. This population based nationally representative survey warrants health system's  
271 greater attention for addressing the challenges of pain and disabilities associated with joint pain.  
272 Further prospective studies are needed to estimate the impact of this group of conditions  
273 particularly addressing related disabilities and loss of works. We believe the results of our study

1  
2  
3 274 can support for policy and planning for joint pain managment in Nepal.  
4  
5  
6 275  
7  
8  
9 276  
10  
11  
12  
13  
14  
15  
16  
17  
18  
19  
20  
21  
22  
23  
24  
25  
26  
27  
28  
29  
30  
31  
32  
33  
34  
35  
36  
37  
38  
39  
40  
41  
42  
43  
44  
45  
46  
47  
48  
49  
50  
51  
52  
53  
54  
55  
56  
57  
58  
59  
60

For peer review only

1  
2  
3 277 **Acknowledgements:** We are grateful to Ministry of Health and Population , Government of  
4  
5 278 Nepal for continuous support on genertain gevidences on NCDs and their risk factors in nepal.  
6  
7 279 our sincere appreciation towards SEARO and Nepal country office of WHO for technical  
8  
9 280 assistance. We also extend our gratitude to the Central Bureau of Statistics for assisting the  
10  
11 281 sampling procedure.  
12  
13  
14

15 282 **Contributors:** AP, BB and MD were responsible for the concept and design, analysis and  
16  
17 283 interpretation of data and writing the manuscript. PG, SK, SB, and SS participated in the  
18  
19 284 acquisition, analysis and interpretation of data, and critical revision of the manuscript. All  
20  
21 285 authors wrote the article, edited and approved the final draft of the manuscript.  
22  
23  
24

25 286 **Funding:** The authors have not declared a specific grant for this research from any funding  
26  
27 287 agency in the public, commercial or not-for-profit sectors.  
28  
29  
30

31 288 **Data sharing statement:** STEPS tools, data and reports are publicly available at WHO data  
32  
33 289 repositories and can be accessed freely at <https://nada.searo.who.int/index.php/catalog/76> . The  
34  
35 290 data used in the study are also available from this platform.  
36  
37  
38

39 291 **Competing interests:** None declared.  
40  
41

42 292 **Patient and public involvement:** Patients and/or the public were not involved in the design, or  
43  
44 293 conduct, or reporting, or dissemination plans of this research.  
45  
46

47 294 **Patient consent for publication :** Not required.  
48  
49  
50  
51  
52  
53  
54  
55  
56  
57  
58  
59  
60

295 **References**

- 296 1. World Health Organization (WHO)-Nepal. Musculoskeletal conditions [Internet]. 2019.  
297 Available from: [https://www.who.int/news-room/fact-sheets/detail/musculoskeletal-](https://www.who.int/news-room/fact-sheets/detail/musculoskeletal-conditions)  
298 conditions
- 299 2. Woolf AD, Pfleger B. Burden of major musculoskeletal conditions. Bull World Health  
300 Organ. 2003;81:646–56.
- 301 3. Clark S, Horton R. Low back pain: a major global challenge. Lancet (London, England).  
302 2018;391(10137):2302.
- 303 4. Woo T, Lau L, Cheng N, Chan P, Tan K, Gardner A. Efficacy of oral collagen in joint  
304 pain-osteoarthritis and rheumatoid arthritis. J Arthritis. 2017;6(2):1–4.
- 305 5. Ćwirlej-Sozańska A, Wilmowska-Pietruszyńska A, Sozański B, Wiśniowska-Szurlej A.  
306 Analysis of chronic illnesses and disability in a community-based sample of elderly  
307 people in South-Eastern Poland. Med Sci Monit Int Med J Exp Clin Res. 2018;24:1387.
- 308 6. Neogi T. Joint Pain Epidemiology. Iasp [Internet]. 2016;(11):18–20. Available from:  
309 [https://s3.amazonaws.com/rdcms-](https://s3.amazonaws.com/rdcms-iasp/files/production/public/Content/ContentFolders/GlobalYearAgainstPain2/2016/Factsheets/English/11.JointPainEpidemiology.pdf)  
310 [iasp/files/production/public/Content/ContentFolders/GlobalYearAgainstPain2/2016/Facts](https://s3.amazonaws.com/rdcms-iasp/files/production/public/Content/ContentFolders/GlobalYearAgainstPain2/2016/Factsheets/English/11.JointPainEpidemiology.pdf)  
311 [heets/English/11.JointPainEpidemiology.pdf](https://s3.amazonaws.com/rdcms-iasp/files/production/public/Content/ContentFolders/GlobalYearAgainstPain2/2016/Factsheets/English/11.JointPainEpidemiology.pdf)
- 312 7. Anderson KO, Green CR, Payne R. Racial and ethnic disparities in pain: causes and  
313 consequences of unequal care. J Pain. 2009;10(12):1187–204.
- 314 8. Bhattarai B, Pokhrel PK, Tripathi M, Rahman TR, Baral DD, Pande R, et al. Chronic pain  
315 and cost: an epidemiological study in the communities of Sunsari district of Nepal. Nepal



- 1  
2  
3 316 Med Coll J. 2007;9(1):6–11.  
4  
5  
6 317 9. Jackson T, Thomas S, Stabile V, Shotwell M, Han X, McQueen K. A systematic review  
7  
8 318 and meta-analysis of the global burden of chronic pain without clear etiology in low-and  
9  
10 319 middle-income countries: trends in heterogeneous data and a proposal for new assessment  
11  
12 320 methods. *Anesth & Analg*. 2016;123(3):739–48.  
13  
14  
15  
16 321 10. Badley EM, Wilfong JM, Yip C, Millstone DB, Perruccio A V. The contribution of age  
17  
18 322 and obesity to the number of painful joint sites in individuals reporting osteoarthritis: a  
19  
20 323 population-based study. *Rheumatology*. 2020;59(11):3350–7.  
21  
22  
23  
24 324 11. Hashemi SM, Rohanifar R, Azarfarin R, Razavi SS, Momenzadeh S. A comparison of the  
25  
26 325 sociodemographic and clinical characteristics of patients referring to a pain clinic with  
27  
28 326 subacute and chronic pain. *Anesthesiol pain Med*. 2016;6(6).  
29  
30  
31  
32 327 12. Morais SH de O, Segheto W, Silva DCG da, Coelho FA, Reis VG, Ferreira FG, et al.  
33  
34 328 Chronic joint symptoms in adults: A population-based study. *Rev Assoc Med Bras*.  
35  
36 329 2017;63:575–82.  
37  
38  
39  
40 330 13. World Health Organization. WHO STEPS Instrument (Core and Expanded) [Internet].  
41  
42 331 [cited 2021 Jul 29]. Available from:  
43  
44 332 [https://www.who.int/ncds/surveillance/steps/instrument/STEPS\\_Instrument\\_V3.2.pdf?ua=](https://www.who.int/ncds/surveillance/steps/instrument/STEPS_Instrument_V3.2.pdf?ua=1)  
45  
46 333 1  
47  
48  
49 334 14. Dhimal M, Bista B, Bhattarai S, Dixit LP, Hyder MKA, Agrawal N, Rani M JA.  
50  
51 335 Noncommunicable Disease Risk Factors: STEPS Survey Nepal 2019 [Internet]. Available  
52  
53 336 from: <https://www.who.int/docs/default-source/nepal-documents/ncds/ncd-steps-survey->

- 1  
2  
3 337 2019-compressed.pdf?sfvrsn=807bc4c6\_2  
4  
5  
6 338 15. Kulandaivelan S, Tigdania N, Ateef M, Chaturvedi R, Joshi S, Malik A, et al. Prevalence  
7  
8 of knee pain and its correlates with specific emphasis on CVD risk factors in Hisar urban  
9 339 population. *Int J Clin Rheumtol*. 2017;12(4):Table 3,page 94.  
10 340  
11  
12  
13  
14 341 16. Haq SA, Darmawan J, Islam MN, Ahmed M, Banik SK, Fazlur Rahman AKM, et al.  
15  
16 342 Incidence of musculoskeletal pain and rheumatic disorders in a Bangladeshi rural  
17  
18 343 community: a WHO-APLAR-COPCORD study. *Int J Rheum Dis*. 2008;11(3):216–23.  
19  
20  
21  
22 344 17. Zahid-Al-Quadir A, Zaman MM, Ahmed S, Bhuiyan MR, Rahman MM, Patwary I, et al.  
23  
24 345 Prevalence of musculoskeletal conditions and related disabilities in Bangladeshi adults: a  
25  
26 346 cross-sectional national survey. *BMC Rheumatol*. 2020;4(1):1–14.  
27  
28  
29  
30 347 18. Veerapen K, Wigley RD, Valkenburg H. Musculoskeletal pain in Malaysia: a COPCORD  
31  
32 348 survey. *J Rheumatol*. 2007;34(1):207–13.  
33  
34  
35 349 19. Liu Y, Zhang H, Liang N, Fan W, Li J, Huang Z, et al. Prevalence and associated factors  
36  
37 350 of knee osteoarthritis in a rural Chinese adult population: an epidemiological survey.  
38  
39 351 *BMC Public Health*. 2015;16(1):94.  
40  
41  
42  
43 352 20. Strazdins L, Bammer G. Women, work and musculoskeletal health. *Soc Sci Med*.  
44  
45 353 2004;58(6):997–1005.  
46  
47  
48 354 21. Wijnhoven HAH, De Vet HCW, Picavet HSJ. Prevalence of musculoskeletal disorders is  
49  
50 355 systematically higher in women than in men. *Clin J Pain*. 2006;22(8):717–24.  
51  
52  
53  
54 356 22. Cecchi F, Debolini P, Lova RM, Macchi C, Bandinelli S, Bartali B, et al. Epidemiology of  
55  
56 357 back pain in a representative cohort of Italian persons 65 years of age and older: the

- 1  
2  
3 358 InCHIANTI study. *Spine (Phila Pa 1976)*. 2006;31(10):1149.  
4  
5  
6 359 23. Plesh O, Adams SH, Gansky SA. Temporomandibular Joint and Muscle Disorder  
7  
8 360 (TMJMD)-type pain and Co-morbid pains in a National US Sample. *J Orofac Pain*.  
9  
10 361 2011;25(3):190.  
11  
12  
13  
14 362 24. Jackson T, Chen H, Iezzi T, Yee M, Chen F. Prevalence and correlates of chronic pain in a  
15  
16 363 random population study of adults in Chongqing, China. *Clin J Pain*. 2014;30(4):346–52.  
17  
18  
19 364 25. Jiang X, Sandberg MEC, Saevarsdottir S, Klareskog L, Alfredsson L, Bengtsson C.  
20  
21 365 Higher education is associated with a better rheumatoid arthritis outcome concerning for  
22  
23 366 pain and function but not disease activity: results from the EIRA cohort and Swedish  
24  
25 367 rheumatology register. *Arthritis Res Ther*. 2015;17(1):317.  
26  
27  
28  
29 368 26. Riskowski JL. Associations of socioeconomic position and pain prevalence in the United  
30  
31 369 States: findings from the National Health and Nutrition Examination Survey. *Pain Med*.  
32  
33 370 2014;15(9):1508–21.  
34  
35  
36  
37 371 27. Hagen KB, Dagfinrud H, Moe RH, Østerås N, Kjekken I, Grotle M, et al. Exercise therapy  
38  
39 372 for bone and muscle health: an overview of systematic reviews. *BMC Med*. 2012;10(1):1–  
40  
41 373 11.  
42  
43  
44  
45 374 28. Stavropoulos-Kalinoglou A, Metsios GS, van Zanten JJV, Nightingale P, Kitas GD,  
46  
47 375 Koutedakis Y. Individualised aerobic and resistance exercise training improves  
48  
49 376 cardiorespiratory fitness and reduces cardiovascular risk in patients with rheumatoid  
50  
51 377 arthritis. *Ann Rheum Dis*. 2013;72(11):1819–25.  
52  
53  
54  
55 378 29. Gonzalez G.  $\{\$published data only\}$  Gonzalez Gonzalez J, del Teso Rubio MDM,  
56  
57

- 1  
2  
3 379 Walino Paniagua CN, Criado-Alvarez JJ, Sanchez Holgado J. Symptomatic pain and  
4  
5 380 fibromyalgia treatment through multidisciplinary approach for primary care. *Reumatol*  
6  
7 381 *Clin.* 2015;11(2):22–6.
- 8  
9  
10  
11 382 30. Weingarten TN, Moeschler SM, Ptaszynski AE, Hooten WM, Beebe TJ, Warner DO. An  
12  
13 383 assessment of the association between smoking status, pain intensity, and functional  
14  
15 384 interference in patients with chronic pain. *Pain Physician.* 2008;11(5):643–53.
- 16  
17  
18 385 31. Mundal I, Gråwe RW, Bjørngaard JH, Linaker OM, Fors EA. Psychosocial factors and  
19  
20 386 risk of chronic widespread pain: an 11-year follow-up study—the HUNT study. *PAIN®.*  
21  
22 387 2014;155(8):1555–61.
- 23  
24  
25  
26 388 32. Palmer KT, Syddall H, Cooper C, Coggon D. Smoking and musculoskeletal disorders:  
27  
28 389 findings from a British national survey. *Ann Rheum Dis.* 2003;62(1):33–6.
- 29  
30  
31  
32 390 33. Miranda H, Viikari-Juntura E, Martikainen R, Riihimäki H. A prospective study on knee  
33  
34 391 pain and its risk factors. *Osteoarthr Cartil.* 2002;10(8):623–30.
- 35  
36  
37 392 34. Pope DP, Hunt IM, Birrell FN, Silman AJ, MacFarlane GJ. Hip pain onset in relation to  
38  
39 393 cumulative workplace and leisure time mechanical load: a population based case-control  
40  
41 394 study. *Ann Rheum Dis.* 2003;62(4):322–6.
- 42  
43  
44  
45 395 35. Adamson J, Ebrahim S, Dieppe P, Hunt K. Prevalence and risk factors for joint pain  
46  
47 396 among men and women in the West of Scotland Twenty-07 study. *Ann Rheum Dis.*  
48  
49 397 2006;65(4):520–4.
- 50  
51  
52  
53 398 36. van Hecke O, Torrance N, Smith BH. Chronic pain epidemiology--where do lifestyle  
54  
55 399 factors fit in? *Br J pain.* 2013;7(4):209–17.
- 56  
57  
58  
59  
60

1  
2  
3 400  
4  
5  
6 401  
7  
8  
9 402  
10  
11  
12 403  
13  
14  
15 404  
16  
17  
18  
19  
20  
21  
22  
23  
24  
25  
26  
27  
28  
29  
30  
31  
32  
33  
34  
35  
36  
37  
38  
39  
40  
41  
42  
43  
44  
45  
46  
47  
48  
49  
50  
51  
52  
53  
54  
55  
56  
57  
58  
59  
60

For peer review only

STROBE Statement—Checklist of items that should be included in reports of *cross-sectional studies*

|                              | Item No | Recommendation                                                                                                                                                                                    | Page No |
|------------------------------|---------|---------------------------------------------------------------------------------------------------------------------------------------------------------------------------------------------------|---------|
| <b>Title and abstract</b>    | 1       | (a) Indicate the study's design with a commonly used term in the title or the abstract                                                                                                            | 1-2     |
|                              |         | (b) Provide in the abstract an informative and balanced summary of what was done and what was found                                                                                               | 2-3     |
| <b>Introduction</b>          |         |                                                                                                                                                                                                   |         |
| Background/rationale         | 2       | Explain the scientific background and rationale for the investigation being reported                                                                                                              | 5-6     |
| Objectives                   | 3       | State specific objectives, including any prespecified hypotheses                                                                                                                                  | 6       |
| <b>Methods</b>               |         |                                                                                                                                                                                                   |         |
| Study design                 | 4       | Present key elements of study design early in the paper                                                                                                                                           | 7       |
| Setting                      | 5       | Describe the setting, locations, and relevant dates, including periods of recruitment, exposure, follow-up, and data collection                                                                   | 7-8     |
| Participants                 | 6       | (a) Give the eligibility criteria, and the sources and methods of selection of participants                                                                                                       | 8       |
| Variables                    | 7       | Clearly define all outcomes, exposures, predictors, potential confounders, and effect modifiers. Give diagnostic criteria, if applicable                                                          | 8-9     |
| Data sources/<br>measurement | 8*      | For each variable of interest, give sources of data and details of methods of assessment (measurement). Describe comparability of assessment methods if there is more than one group              | 7-9     |
| Bias                         | 9       | Describe any efforts to address potential sources of bias                                                                                                                                         | 10      |
| Study size                   | 10      | Explain how the study size was arrived at                                                                                                                                                         | 7-8     |
| Quantitative variables       | 11      | Explain how quantitative variables were handled in the analyses. If applicable, describe which groupings were chosen and why                                                                      | 10      |
| Statistical methods          | 12      | (a) Describe all statistical methods, including those used to control for confounding                                                                                                             | 10      |
|                              |         | (b) Describe any methods used to examine subgroups and interactions                                                                                                                               | 10      |
|                              |         | (c) Explain how missing data were addressed                                                                                                                                                       | 10      |
|                              |         | (d) If applicable, describe analytical methods taking account of sampling strategy                                                                                                                | 7-8     |
|                              |         | (e) Describe any sensitivity analyses                                                                                                                                                             | na      |
| <b>Results</b>               |         |                                                                                                                                                                                                   |         |
| Participants                 | 13*     | (a) Report numbers of individuals at each stage of study—eg numbers potentially eligible, examined for eligibility, confirmed eligible, included in the study, completing follow-up, and analysed | 7-8     |
|                              |         | (b) Give reasons for non-participation at each stage                                                                                                                                              | 7-9     |
|                              |         | (c) Consider use of a flow diagram                                                                                                                                                                | 7-8     |
| Descriptive data             | 14*     | (a) Give characteristics of study participants (eg demographic, clinical, social) and information on exposures and potential confounders                                                          | 8       |
|                              |         | (b) Indicate number of participants with missing data for each variable of interest                                                                                                               | 10      |
| Outcome data                 | 15*     | Report numbers of outcome events or summary measures                                                                                                                                              | 12-19   |
| Main results                 | 16      | (a) Give unadjusted estimates and, if applicable, confounder-adjusted estimates and their precision (eg, 95% confidence interval). Make clear                                                     | 10      |

|                          |    |                                                                                                                                                                            |       |
|--------------------------|----|----------------------------------------------------------------------------------------------------------------------------------------------------------------------------|-------|
|                          |    | which confounders were adjusted for and why they were included                                                                                                             |       |
|                          |    | (b) Report category boundaries when continuous variables were categorized                                                                                                  | 10    |
|                          |    | (c) If relevant, consider translating estimates of relative risk into absolute risk for a meaningful time period                                                           | na    |
| Other analyses           | 17 | Report other analyses done—eg analyses of subgroups and interactions, and sensitivity analyses                                                                             | 10    |
| <b>Discussion</b>        |    |                                                                                                                                                                            |       |
| Key results              | 18 | Summarise key results with reference to study objectives                                                                                                                   | 20-22 |
| Limitations              | 19 | Discuss limitations of the study, taking into account sources of potential bias or imprecision. Discuss both direction and magnitude of any potential bias                 | 22    |
| Interpretation           | 20 | Give a cautious overall interpretation of results considering objectives, limitations, multiplicity of analyses, results from similar studies, and other relevant evidence | 20-22 |
| Generalisability         | 21 | Discuss the generalisability (external validity) of the study results                                                                                                      | 22    |
| <b>Other information</b> |    |                                                                                                                                                                            |       |
| Funding                  | 22 | Give the source of funding and the role of the funders for the present study and, if applicable, for the original study on which the present article is based              | 24    |

\*Give information separately for exposed and unexposed groups.

**Note:** An Explanation and Elaboration article discusses each checklist item and gives methodological background and published examples of transparent reporting. The STROBE checklist is best used in conjunction with this article (freely available on the Web sites of PLoS Medicine at <http://www.plosmedicine.org/>, Annals of Internal Medicine at <http://www.annals.org/>, and Epidemiology at <http://www.epidem.com/>). Information on the STROBE Initiative is available at [www.strobe-statement.org](http://www.strobe-statement.org).
